# Supplementary material for: Integrated transcriptomic and metabolomic analyses reveal the effects of callose deposition and multihormone signal transduction pathways on the tea plant-Colletotrichum camelliae interaction
Source: PubMed Central journal article supplement (PMC7393116; doi:10.1038/s41598-020-69729-x), 2020-07-30
Supplement: 41598_2020_69729_MOESM1_ESM.pdf [file 41598_2020_69729_MOESM1_ESM.pdf]

## Supplementary Information

### **Integrated transcriptomic and metabolomic analyses reveal the effects of callose deposition and multihormone signal transduction pathways on the tea plant-*Colletotrichum camelliae* interaction**

Qinhua Lu<sup>1</sup>, Yuchun Wang<sup>1</sup>, Fei Xiong<sup>1,2</sup>, Xinzhong Zhang<sup>1</sup>, Nana Li<sup>1</sup>, Lu Wang<sup>1</sup>, Xinyuan Hao<sup>1</sup>, Jianming

Zeng<sup>1</sup>, Yajun Yang<sup>1\*</sup> and Xinchao Wang<sup>1\*</sup>

1 Tea Research Institute of Chinese Academy of Agricultural Sciences, Hangzhou, China

2 Tea Research Institute, Nanjing Agricultural University, Nanjing, China

**Supplementary Table S1 The quality of RNA-seq**

| sample | Raw reads | Clean reads | Clean bases(G) | Error rate | Q20   | Q30   | GC %  | Total map            |
|--------|-----------|-------------|----------------|------------|-------|-------|-------|----------------------|
| T12h_1 | 49815466  | 49071720    | 7.36           | 0.03       | 97.48 | 93.02 | 43.52 | 44601778<br>(90.89%) |
| T12h_2 | 50831572  | 50251972    | 7.54           | 0.03       | 97.26 | 92.52 | 43.49 | 45525862<br>(90.6%)  |
| T12h_3 | 56809808  | 56148184    | 8.42           | 0.03       | 97.6  | 93.32 | 43.66 | 51151888<br>(91.1%)  |
| C12h_1 | 55864712  | 55334744    | 8.3            | 0.03       | 97.6  | 93.28 | 43.94 | 50593522<br>(91.43%) |
| C12h_2 | 45645770  | 45095710    | 6.76           | 0.03       | 97.25 | 92.51 | 43.73 | 40942481<br>(90.79%) |
| C12h_3 | 52341694  | 51820590    | 7.77           | 0.03       | 97.49 | 93.04 | 44.08 | 47385295<br>(91.44%) |
| T24h_1 | 51352088  | 50779830    | 7.62           | 0.03       | 97.22 | 92.48 | 44.11 | 45981203<br>(90.55%) |
| T24h_2 | 49478520  | 48820672    | 7.32           | 0.03       | 97.36 | 92.78 | 43.97 | 44309471<br>(90.76%) |
| T24h_3 | 56215976  | 55542038    | 8.33           | 0.03       | 97.15 | 92.25 | 44.24 | 50531894<br>(90.98%) |
| C24h_1 | 48074970  | 47315864    | 7.1            | 0.03       | 97.42 | 92.87 | 44.24 | 43099261<br>(91.09%) |
| C24h_2 | 49773122  | 49051488    | 7.36           | 0.03       | 97.58 | 93.23 | 44.11 | 44694606<br>(91.12%) |
| C24h_3 | 52282844  | 51442668    | 7.72           | 0.03       | 97.54 | 93.19 | 44.27 | 46805276<br>(90.99%) |
| T72h_1 | 47426446  | 46557026    | 6.98           | 0.03       | 97.14 | 92.28 | 44.47 | 40140793<br>(86.22%) |
| T72h_2 | 50975512  | 50026170    | 7.5            | 0.03       | 97.4  | 92.9  | 44.04 | 44201743<br>(88.36%) |
| T72h_3 | 48841340  | 48073218    | 7.21           | 0.03       | 97.22 | 92.44 | 44.31 | 42628791<br>(88.67%) |
| C72h_1 | 51330228  | 50127660    | 7.52           | 0.03       | 97.37 | 92.77 | 43.8  | 45542894<br>(90.85%) |
| C72h_2 | 71651004  | 70494396    | 10.57          | 0.03       | 97.71 | 93.74 | 44.03 | 64269666<br>(91.17%) |
| C72h_3 | 61622244  | 60832450    | 9.12           | 0.03       | 97.78 | 93.87 | 43.95 | 55464598<br>(91.18%) |

Supplementary Table S2 Significantly differentially expressed genes (DEGs) in different time points

Supplementary Table S3 List of enriched Gene Ontology terms identified from all DEGs

**Supplementary Table S4 The top 35 GO terms are listed based on the number of assigned DEGs and P value**

| GOID                       | Ontology | Term                                      | Number in input list (q) | Number in the reference list (m) | q/m (%) | P-value  |
|----------------------------|----------|-------------------------------------------|--------------------------|----------------------------------|---------|----------|
| Upregulated genes (12 hpi) |          |                                           |                          |                                  |         |          |
| GO:0051716                 | BP       | cellular response to stimulus             | 30                       | 2587                             | 1.16    | 0.000148 |
| GO:0043207                 | BP       | response to external biotic stimulus      | 23                       | 1502                             | 1.53    | 5.47E-05 |
| GO:0051707                 | BP       | response to other organism                | 23                       | 1502                             | 1.53    | 5.47E-05 |
| GO:0009725                 | BP       | response to hormone                       | 19                       | 1757                             | 1.08    | 0.0203   |
| GO:0033554                 | BP       | cellular response to stress               | 18                       | 1162                             | 1.55    | 0.00054  |
| GO:0006955                 | BP       | immune response                           | 13                       | 748                              | 1.74    | 0.00371  |
| GO:0042594                 | BP       | response to starvation                    | 11                       | 346                              | 3.18    | 0.000139 |
| GO:0009620                 | BP       | response to fungus                        | 10                       | 557                              | 1.80    | 0.0178   |
| GO:0010243                 | BP       | response to organonitrogen compound       | 9                        | 445                              | 2.02    | 0.0165   |
| GO:0015706                 | BP       | nitrate transport                         | 6                        | 206                              | 2.91    | 0.0277   |
| GO:0001666                 | BP       | response to hypoxia                       | 5                        | 100                              | 5.00    | 0.0101   |
| GO:0017076                 | MF       | purine nucleotide binding                 | 10                       | 605                              | 1.65    | 0.0283   |
| GO:0030554                 | MF       | adenyl nucleotide binding                 | 10                       | 448                              | 2.23    | 0.00405  |
| GO:0004601                 | MF       | peroxidase activity                       | 8                        | 100                              | 8.00    | 1.56E-05 |
| GO:0001067                 | MF       | regulatory region nucleic acid binding    | 4                        | 21                               | 19.05   | 0.000494 |
| GO:0051716                 | BP       | cellular response to stimulus             | 30                       | 2587                             | 1.16    | 0.000148 |
| Upregulated gene (24 hpi)  |          |                                           |                          |                                  |         |          |
| GO:0010243                 | BP       | response to organonitrogen compound       | 74                       | 445                              | 16.63   | 1.18E-34 |
| GO:0051716                 | BP       | cellular response to stimulus             | 181                      | 2587                             | 7.00    | 1.8E-32  |
| GO:0043207                 | BP       | response to external biotic stimulus      | 124                      | 1502                             | 8.26    | 1.43E-27 |
| GO:0051707                 | BP       | response to other organism                | 124                      | 1502                             | 8.26    | 1.43E-27 |
| GO:0006955                 | BP       | immune response                           | 80                       | 748                              | 10.70   | 3.84E-24 |
| GO:0009725                 | BP       | response to hormone                       | 125                      | 1757                             | 7.11    | 5.47E-22 |
| GO:0070887                 | BP       | cellular response to chemical stimulus    | 105                      | 1312                             | 8.00    | 5.84E-22 |
| GO:0033554                 | BP       | cellular response to stress               | 97                       | 1162                             | 8.35    | 1.81E-21 |
| GO:0009404                 | BP       | toxin metabolic process                   | 40                       | 225                              | 17.78   | 2.35E-19 |
| GO:0046942                 | BP       | carboxylic acid transport                 | 43                       | 276                              | 15.58   | 1.35E-18 |
| GO:0006865                 | BP       | amino acid transport                      | 41                       | 252                              | 16.27   | 2.1E-18  |
| GO:0015711                 | BP       | organic anion transport                   | 43                       | 298                              | 14.43   | 2.49E-17 |
| GO:0098754                 | BP       | detoxification                            | 37                       | 226                              | 16.37   | 1.15E-16 |
| GO:0015706                 | BP       | nitrate transport                         | 34                       | 206                              | 16.50   | 2.13E-15 |
| GO:0044248                 | BP       | cellular catabolic process                | 101                      | 1535                             | 6.58    | 3.44E-15 |
| GO:0072657                 | BP       | protein localization to membrane          | 44                       | 377                              | 11.67   | 2.5E-14  |
| GO:0080135                 | BP       | regulation of cellular response to stress | 44                       | 388                              | 11.34   | 7.23E-14 |
| GO:0050776                 | BP       | regulation of immune response             | 45                       | 428                              | 10.51   | 5.42E-13 |
| GO:0042446                 | BP       | hormone biosynthetic process              | 61                       | 741                              | 8.23    | 6.84E-13 |

|                           |    |                                                         |     |      |       |          |
|---------------------------|----|---------------------------------------------------------|-----|------|-------|----------|
| GO:0048585                | BP | negative regulation of response to stimulus             | 41  | 370  | 11.08 | 1.52E-12 |
| GO:0042445                | BP | hormone metabolic process                               | 64  | 819  | 7.81  | 1.58E-12 |
| GO:2000377                | BP | regulation of reactive oxygen species metabolic process | 30  | 207  | 14.49 | 5.03E-12 |
| GO:0051193                | BP | regulation of cofactor metabolic process                | 30  | 209  | 14.35 | 6.49E-12 |
| GO:0009651                | BP | response to salt stress                                 | 61  | 785  | 7.77  | 8.32E-12 |
| GO:0009723                | BP | response to ethylene                                    | 39  | 355  | 10.99 | 8.47E-12 |
| GO:0009617                | BP | response to bacterium                                   | 52  | 607  | 8.57  | 1.47E-11 |
| GO:0016310                | BP | phosphorylation                                         | 64  | 868  | 7.37  | 2.05E-11 |
| GO:0052542                | BP | defense response by callose deposition                  | 17  | 62   | 27.42 | 3.71E-11 |
| GO:0034976                | BP | response to endoplasmic reticulum stress                | 38  | 358  | 10.61 | 4.94E-11 |
| GO:0009595                | BP | detection of biotic stimulus                            | 21  | 106  | 19.81 | 6.37E-11 |
| GO:0031348                | BP | negative regulation of defense response                 | 33  | 278  | 11.87 | 7.84E-11 |
| GO:0009620                | BP | response to fungus                                      | 48  | 557  | 8.62  | 9.96E-11 |
| GO:0006970                | BP | response to osmotic stress                              | 61  | 841  | 7.25  | 1.47E-10 |
| GO:0071944                | CC | cell periphery                                          | 176 | 3735 | 4.71  | 6.98E-13 |
| GO:0004601                | MF | peroxidase activity                                     | 21  | 100  | 21.00 | 1.97E-11 |
| Upregulated gene (72 hpi) |    |                                                         |     |      |       |          |
| GO:0051716                | BP | cellular response to stimulus                           | 610 | 2587 | 23.58 | 1.58E-81 |
| GO:0010243                | BP | response to organonitrogen compound                     | 208 | 445  | 46.74 | 2.81E-80 |
| GO:0033554                | BP | cellular response to stress                             | 347 | 1162 | 29.86 | 6.85E-71 |
| GO:0034976                | BP | response to endoplasmic reticulum stress                | 157 | 358  | 43.85 | 1.91E-55 |
| GO:0006955                | BP | immune response                                         | 238 | 748  | 31.82 | 3.3E-53  |
| GO:0043207                | BP | response to external biotic stimulus                    | 368 | 1502 | 24.50 | 4.28E-51 |
| GO:0051707                | BP | response to other organism                              | 368 | 1502 | 24.50 | 4.28E-51 |
| GO:0006865                | BP | amino acid transport                                    | 116 | 252  | 46.03 | 2.58E-43 |
| GO:0046942                | BP | carboxylic acid transport                               | 122 | 276  | 44.20 | 2.71E-43 |
| GO:0015711                | BP | organic anion transport                                 | 122 | 298  | 40.94 | 4.47E-39 |
| GO:0009404                | BP | toxin metabolic process                                 | 97  | 225  | 43.11 | 3.78E-33 |
| GO:0098754                | BP | detoxification                                          | 96  | 226  | 42.48 | 3.67E-32 |
| GO:0009725                | BP | response to hormone                                     | 356 | 1757 | 20.26 | 2.1E-30  |
| GO:0070887                | BP | cellular response to chemical stimulus                  | 287 | 1312 | 21.88 | 7.38E-30 |
| GO:0015833                | BP | peptide transport                                       | 247 | 1084 | 22.79 | 2.95E-28 |
| GO:0035966                | BP | response to topologically incorrect protein             | 121 | 370  | 32.70 | 1.01E-27 |
| GO:0016310                | BP | phosphorylation                                         | 210 | 868  | 24.19 | 1.77E-27 |
| GO:0006986                | BP | response to unfolded protein                            | 79  | 188  | 42.02 | 5.3E-26  |
| GO:0052542                | BP | defense response by callose deposition                  | 43  | 62   | 69.35 | 1.97E-25 |
| GO:0009617                | BP | response to bacterium                                   | 161 | 607  | 26.52 | 2.01E-25 |
| GO:0072657                | BP | protein localization to membrane                        | 118 | 377  | 31.30 | 3.95E-25 |
| GO:0044248                | BP | cellular catabolic process                              | 307 | 1535 | 20.00 | 5.7E-25  |
| GO:0006970                | BP | response to osmotic stress                              | 199 | 841  | 23.66 | 1.05E-24 |
| GO:0050776                | BP | regulation of immune response                           | 127 | 428  | 29.67 | 1.1E-24  |

|                             |    |                                                                          |     |      |        |          |
|-----------------------------|----|--------------------------------------------------------------------------|-----|------|--------|----------|
| GO:0080135                  | BP | regulation of cellular response to stress                                | 118 | 388  | 30.41  | 6.46E-24 |
| GO:0045184                  | BP | establishment of protein localization                                    | 218 | 975  | 22.36  | 1.11E-23 |
| GO:0009651                  | BP | response to salt stress                                                  | 186 | 785  | 23.69  | 4.1E-23  |
| GO:0015824                  | BP | proline transport                                                        | 45  | 74   | 60.81  | 4.98E-23 |
| GO:0009723                  | BP | response to ethylene                                                     | 109 | 355  | 30.70  | 1.95E-22 |
| GO:0071944                  | CC | cell periphery                                                           | 761 | 3735 | 20.37  | 2E-72    |
| GO:0012505                  | CC | endomembrane system                                                      | 380 | 1675 | 22.69  | 3.43E-44 |
| GO:0051740                  | MF | ethylene binding                                                         | 7   | 5    | 140.00 | 0        |
| GO:1901265                  | MF | nucleoside phosphate binding                                             | 219 | 839  | 26.10  | 8.06E-34 |
| GO:0000166                  | MF | nucleotide binding                                                       | 219 | 839  | 26.10  | 8.06E-34 |
| GO:0017076                  | MF | purine nucleotide binding                                                | 155 | 605  | 25.62  | 8.92E-23 |
| Downregulated gene (12 hpi) |    |                                                                          |     |      |        |          |
| GO:0015979                  | BP | photosynthesis                                                           | 21  | 403  | 5.21   | 1.14E-09 |
| GO:0009657                  | BP | plastid organization                                                     | 16  | 406  | 3.94   | 9.79E-06 |
| GO:0006733                  | BP | oxidoreduction coenzyme metabolic process                                | 16  | 427  | 3.75   | 1.76E-05 |
| GO:0006091                  | BP | generation of precursor metabolites and energy                           | 18  | 605  | 2.98   | 6.19E-05 |
| GO:0044283                  | BP | small molecule biosynthetic process                                      | 28  | 1384 | 2.02   | 8.06E-05 |
| GO:0017144                  | BP | drug metabolic process                                                   | 20  | 831  | 2.41   | 0.000261 |
| GO:0070838                  | BP | divalent metal ion transport                                             | 10  | 210  | 4.76   | 0.000385 |
| GO:0051186                  | BP | cofactor metabolic process                                               | 21  | 935  | 2.25   | 0.000387 |
| GO:0006790                  | BP | sulfur compound metabolic process                                        | 18  | 712  | 2.53   | 0.000405 |
| GO:0006732                  | BP | coenzyme metabolic process                                               | 16  | 585  | 2.74   | 0.000537 |
| GO:0071214                  | BP | cellular response to abiotic stimulus                                    | 9   | 173  | 5.20   | 0.000538 |
| GO:0104004                  | BP | cellular response to environmental stimulus                              | 9   | 173  | 5.20   | 0.000538 |
| GO:0055082                  | BP | cellular chemical homeostasis                                            | 11  | 308  | 3.57   | 0.00136  |
| GO:0019725                  | BP | cellular homeostasis                                                     | 11  | 325  | 3.38   | 0.00212  |
| GO:0019637                  | BP | organophosphate metabolic process                                        | 21  | 1095 | 1.92   | 0.00273  |
| GO:0048731                  | BP | system development                                                       | 37  | 2640 | 1.40   | 0.00273  |
| GO:0006796                  | BP | phosphate-containing compound metabolic process                          | 28  | 1749 | 1.60   | 0.003    |
| GO:0043933                  | BP | protein-containing complex subunit organization                          | 14  | 546  | 2.56   | 0.00304  |
| GO:0022900                  | BP | electron transport chain                                                 | 6   | 93   | 6.45   | 0.00457  |
| GO:0006081                  | BP | cellular aldehyde metabolic process                                      | 12  | 431  | 2.78   | 0.00473  |
| GO:0048506                  | BP | regulation of timing of meristematic phase transition                    | 4   | 30   | 13.33  | 0.00504  |
| GO:0048510                  | BP | regulation of timing of transition from vegetative to reproductive phase | 4   | 30   | 13.33  | 0.00504  |
| GO:0006793                  | BP | phosphorus metabolic process                                             | 28  | 1837 | 1.52   | 0.00611  |
| GO:0031323                  | BP | regulation of cellular metabolic process                                 | 34  | 2462 | 1.38   | 0.00669  |
| GO:0048367                  | BP | shoot system development                                                 | 21  | 1241 | 1.69   | 0.0114   |

|                              |    |                                                 |     |      |       |          |
|------------------------------|----|-------------------------------------------------|-----|------|-------|----------|
| GO:0034765                   | BP | regulation of ion transmembrane transport       | 6   | 117  | 5.13  | 0.0127   |
| GO:0010155                   | BP | regulation of proton transport                  | 5   | 77   | 6.49  | 0.0145   |
| GO:1904062                   | BP | regulation of cation transmembrane transport    | 5   | 79   | 6.33  | 0.0161   |
| GO:0000302                   | BP | response to reactive oxygen species             | 9   | 317  | 2.84  | 0.025    |
| GO:0031975                   | CC | envelope                                        | 30  | 902  | 3.33  | 1.14E-09 |
| GO:0044422                   | CC | organelle part                                  | 57  | 3130 | 1.82  | 2.92E-09 |
| GO:0009986                   | CC | cell surface                                    | 3   | 14   | 21.43 | 0.00953  |
| GO:0008187                   | MF | poly-pyrimidine tract binding                   | 4   | 19   | 21.05 | 0.00106  |
| GO:0008266                   | MF | poly(U) RNA binding                             | 4   | 19   | 21.05 | 0.00106  |
| GO:0003727                   | MF | single-stranded RNA binding                     | 4   | 40   | 10.00 | 0.0127   |
| Downregulated genes (24 hpi) |    |                                                 |     |      |       |          |
| GO:0006796                   | BP | phosphate-containing compound metabolic process | 165 | 1749 | 9.43  | 4.96E-40 |
| GO:0006793                   | BP | phosphorus metabolic process                    | 169 | 1837 | 9.20  | 1.05E-39 |
| GO:0016043                   | BP | cellular component organization                 | 219 | 2961 | 7.40  | 8.85E-38 |
| GO:0044237                   | BP | cellular metabolic process                      | 398 | 7935 | 5.02  | 1.7E-33  |
| GO:0009657                   | BP | plastid organization                            | 72  | 406  | 17.73 | 5.12E-33 |
| GO:0006081                   | BP | cellular aldehyde metabolic process             | 74  | 431  | 17.17 | 5.14E-33 |
| GO:0006996                   | BP | organelle organization                          | 162 | 1947 | 8.32  | 1.43E-32 |
| GO:0015979                   | BP | photosynthesis                                  | 71  | 403  | 17.62 | 2.29E-32 |
| GO:0005975                   | BP | carbohydrate metabolic process                  | 120 | 1281 | 9.37  | 6.34E-28 |
| GO:0019637                   | BP | organophosphate metabolic process               | 106 | 1095 | 9.68  | 1.44E-25 |
| GO:0006790                   | BP | sulfur compound metabolic process               | 82  | 712  | 11.52 | 2.32E-24 |
| GO:0006091                   | BP | generation of precursor metabolites and energy  | 74  | 605  | 12.23 | 1.75E-23 |
| GO:0006733                   | BP | oxidoreduction coenzyme metabolic process       | 62  | 427  | 14.52 | 1.86E-23 |
| GO:1901564                   | BP | organonitrogen compound metabolic process       | 262 | 4863 | 5.39  | 2.06E-23 |
| GO:0051186                   | BP | cofactor metabolic process                      | 93  | 935  | 9.95  | 3.69E-23 |
| GO:0006732                   | BP | coenzyme metabolic process                      | 70  | 585  | 11.97 | 1.31E-21 |
| GO:0048367                   | BP | shoot system development                        | 101 | 1241 | 8.14  | 7.74E-19 |
| GO:0006725                   | BP | cellular aromatic compound metabolic process    | 192 | 3385 | 5.67  | 1.79E-18 |
| GO:0043933                   | BP | protein-containing complex subunit organization | 61  | 546  | 11.17 | 2.64E-17 |
| GO:0016310                   | BP | phosphorylation                                 | 78  | 868  | 8.99  | 9.94E-17 |
| GO:0009311                   | BP | oligosaccharide metabolic process               | 37  | 210  | 17.62 | 1.31E-16 |
| GO:0046483                   | BP | heterocycle metabolic process                   | 174 | 3083 | 5.64  | 2.66E-16 |
| GO:1901576                   | BP | organic substance biosynthetic process          | 247 | 5060 | 4.88  | 3.44E-16 |
| GO:0000226                   | BP | microtubule cytoskeleton organization           | 38  | 238  | 15.97 | 1.35E-15 |
| GO:0090698                   | BP | post-embryonic plant morphogenesis              | 56  | 511  | 10.96 | 1.68E-15 |
| GO:0010073                   | BP | meristem maintenance                            | 41  | 284  | 14.44 | 2.76E-15 |

|                             |    |                                                 |      |      |       |          |
|-----------------------------|----|-------------------------------------------------|------|------|-------|----------|
| GO:0009658                  | BP | chloroplast organization                        | 38   | 251  | 15.14 | 7.74E-15 |
| GO:0009653                  | BP | anatomical structure morphogenesis              | 116  | 1769 | 6.56  | 9.73E-15 |
| GO:0044283                  | BP | small molecule biosynthetic process             | 98   | 1384 | 7.08  | 2.42E-14 |
| GO:0043085                  | BP | positive regulation of catalytic activity       | 25   | 115  | 21.74 | 2.62E-13 |
| GO:0044422                  | CC | organelle part                                  | 199  | 3130 | 6.36  | 4.47E-25 |
| GO:0071944                  | CC | cell periphery                                  | 203  | 3735 | 5.44  | 1.31E-17 |
| GO:0031975                  | CC | envelope                                        | 76   | 902  | 8.43  | 8.66E-15 |
| GO:0030554                  | MF | adenyl nucleotide binding                       | 57   | 448  | 12.72 | 9.32E-19 |
| GO:0017076                  | MF | purine nucleotide binding                       | 60   | 605  | 9.92  | 1.14E-14 |
| Downregulated gene (72 hpi) |    |                                                 |      |      |       |          |
| GO:0009657                  | BP | plastid organization                            | 175  | 406  | 43.10 | 1.21E-76 |
| GO:0006081                  | BP | cellular aldehyde metabolic process             | 179  | 431  | 41.53 | 2.79E-75 |
| GO:0006796                  | BP | phosphate-containing compound metabolic process | 395  | 1749 | 22.58 | 4.17E-74 |
| GO:0006793                  | BP | phosphorus metabolic process                    | 405  | 1837 | 22.05 | 6.81E-73 |
| GO:0006996                  | BP | organelle organization                          | 417  | 1947 | 21.42 | 2.71E-71 |
| GO:0016043                  | BP | cellular component organization                 | 536  | 2961 | 18.10 | 3.21E-66 |
| GO:0051186                  | BP | cofactor metabolic process                      | 258  | 935  | 27.59 | 3.45E-65 |
| GO:0044237                  | BP | cellular metabolic process                      | 1063 | 7935 | 13.40 | 2E-63    |
| GO:0019637                  | BP | organophosphate metabolic process               | 269  | 1095 | 24.57 | 9.58E-57 |
| GO:0015979                  | BP | photosynthesis                                  | 142  | 403  | 35.24 | 7.12E-49 |
| GO:0046483                  | BP | heterocycle metabolic process                   | 498  | 3083 | 16.15 | 2.08E-45 |
| GO:0006725                  | BP | cellular aromatic compound metabolic process    | 531  | 3385 | 15.69 | 6.29E-45 |
| GO:0009658                  | BP | chloroplast organization                        | 103  | 251  | 41.04 | 3.71E-42 |
| GO:0006733                  | BP | oxidoreduction coenzyme metabolic process       | 135  | 427  | 31.62 | 2.38E-40 |
| GO:0061024                  | BP | membrane organization                           | 92   | 214  | 42.99 | 1.38E-39 |
| GO:1901564                  | BP | organonitrogen compound metabolic process       | 671  | 4863 | 13.80 | 1.07E-38 |
| GO:0048367                  | BP | shoot system development                        | 254  | 1241 | 20.47 | 3.37E-38 |
| GO:0005975                  | BP | carbohydrate metabolic process                  | 257  | 1281 | 20.06 | 4.12E-37 |
| GO:0006732                  | BP | coenzyme metabolic process                      | 154  | 585  | 26.32 | 1.91E-35 |
| GO:0006790                  | BP | sulfur compound metabolic process               | 172  | 712  | 24.16 | 1.51E-34 |
| GO:0009311                  | BP | oligosaccharide metabolic process               | 81   | 210  | 38.57 | 1.01E-30 |
| GO:1901576                  | BP | organic substance biosynthetic process          | 662  | 5060 | 13.08 | 1.08E-30 |
| GO:0051656                  | BP | establishment of organelle localization         | 57   | 107  | 53.27 | 1.72E-30 |
| GO:0006091                  | BP | generation of precursor metabolites and energy  | 147  | 605  | 24.30 | 1.16E-29 |
| GO:0048731                  | BP | system development                              | 401  | 2640 | 15.19 | 1.35E-29 |
| GO:0007275                  | BP | multicellular organism development              | 489  | 3539 | 13.82 | 1.02E-26 |
| GO:0009791                  | BP | post-embryonic development                      | 338  | 2169 | 15.58 | 1.54E-26 |
| GO:0090698                  | BP | post-embryonic plant morphogenesis              | 126  | 511  | 24.66 | 5.77E-26 |
| GO:0044422                  | CC | organelle part                                  | 572  | 3130 | 18.27 | 5.79E-73 |

|            |    |                              |      |       |       |          |
|------------|----|------------------------------|------|-------|-------|----------|
| GO:0044464 | CC | cell part                    | 2107 | 21711 | 9.70  | 5.92E-29 |
| GO:0031975 | CC | envelope                     | 186  | 902   | 20.62 | 5.63E-28 |
| GO:0000166 | MF | nucleotide binding           | 184  | 839   | 21.93 | 3.69E-31 |
| GO:1901265 | MF | nucleoside phosphate binding | 184  | 839   | 21.93 | 3.69E-31 |
| GO:0030554 | MF | adenyl nucleotide binding    | 122  | 448   | 27.23 | 2.1E-29  |
| GO:0017076 | MF | purine nucleotide binding    | 146  | 605   | 24.13 | 3.96E-29 |

Supplementary Table S5 List of the differentially expressed metabolites (DEMs) in different time points

**Supplementary Table S6 qRT-PCR validation primers**

| Gene ID     | Primer      | Sequence (5'→3')       |
|-------------|-------------|------------------------|
| TEA026913   | Forward (F) | TCGGGTTTCTTCATCCCTAGAC |
|             | Reverse (R) | CGTACCATTGGACAGTAGTGGA |
| novel.17836 | F           | ATGCACTCGAAGGACCAATC   |
|             | R           | GTCGACTAAGTTGTGCCATACC |
| TEA012289   | F           | GCAAGCGACCAAGTTTATGG   |
|             | R           | CTCTCTCTACTCGTCTGATCTC |
| TEA025907   | F           | CCACATGGTTGAGCCTAGAA   |
|             | R           | CAAGATCCGCATGGTTCTCT   |
| TEA019216   | F           | GAGGCGCTCTGTAACATCTA   |
|             | R           | CCAAGGAAGTGGTCAGTGTA   |
| TEA001041   | F           | GAAACGGGACATGGTGATAGAG |
|             | R           | CAGAACGTGCCTCAACATCT   |
| TEA030190   | F           | CGGCTGATAAGGCAAAGGAA   |
|             | R           | ACTCGAGGTAGTGGGAATCA   |
| TEA026494   | F           | GACAGGTCATCCAGAGACAATC |
|             | R           | CTGGAACACCAAGTCCTGATAG |
| TEA011776   | F           | CGGTAGGTCATGGTGACAAG   |
|             | R           | TTGGTTCGAGCAATGGTAGG   |
| TEA004708   | F           | GAAACTGATGCAGGGCTTCT   |
|             | R           | GGGATGAACCATGGCTAACA   |



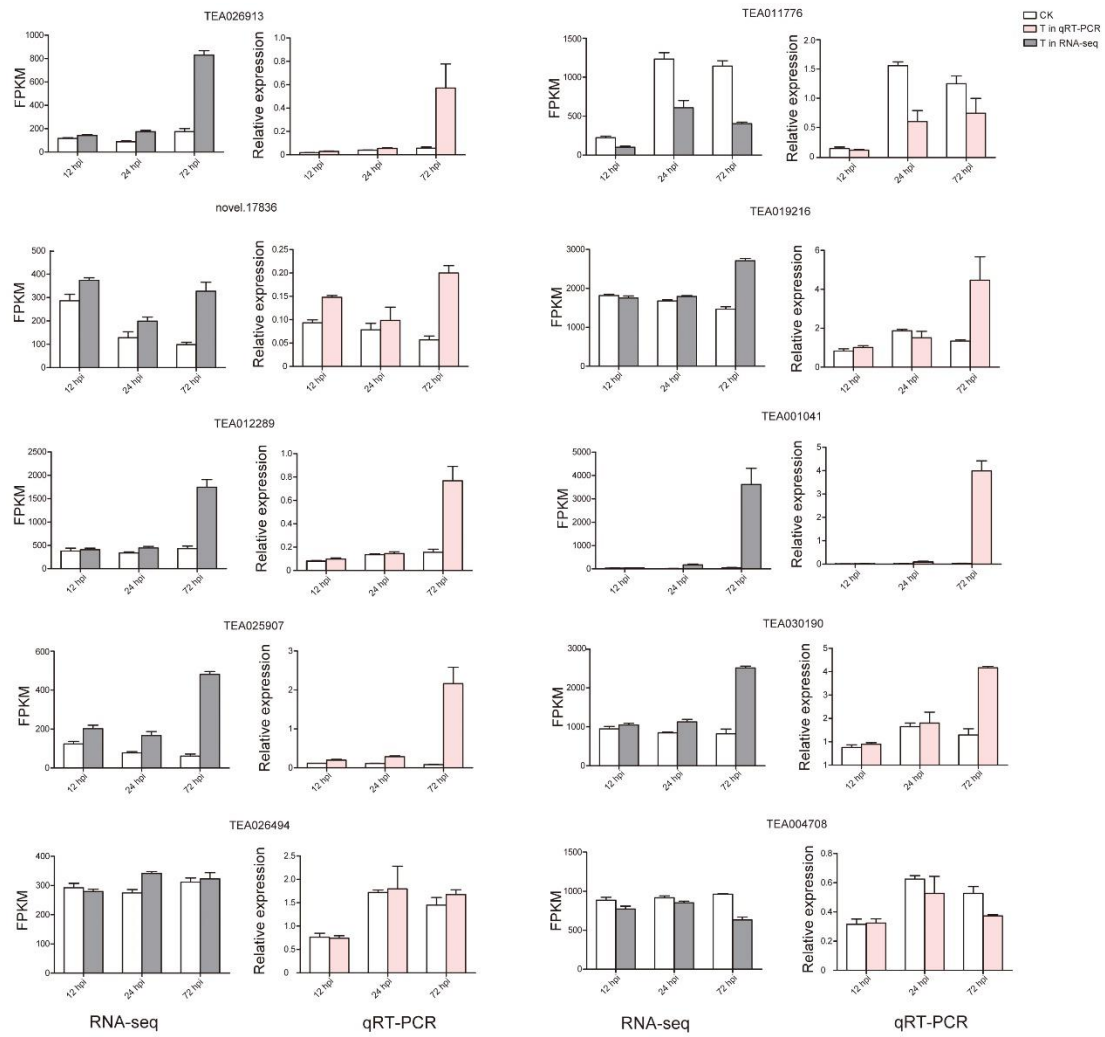

Figure S1 Expression profile comparisons between the RNA-Seq and qRT-PCR data
